# Supplementary material for: Combined and rapid detection of anti-Brucella IgG/IgM in clinical samples based on surface-enhanced Raman scattering-lateral flow immunochromatography
Source: Royal Society of Chemistry journal article supplement (doi:10.1039/d4tb01367k), 2024-01-01
Supplement: d4tb01367k1.pdf [file d4tb01367k1.pdf]

Table S1. Information on IgG/IgM antibodies of 20 positive samples initially screened by the LFIA.

| Sample number | IgM | IgG |
|---------------|-----|-----|
| 1005          | +   | +   |
| 1011          | —   | +   |
| 1013          | +   | +   |
| 1018          | —   | +   |
| 1019          | +   | —   |
| 1022          | —   | +   |
| 1023          | —   | +   |
| 1028          | —   | +   |
| 1029          | +   | +   |
| 1038          | +   | +   |
| 1044          | +   | +   |
| 1050          | +   | +   |
| 1053          | +   | +   |
| 1060          | +   | +   |
| 1066          | +   | +   |
| 1067          | —   | +   |
| 1069          | —   | +   |
| 1070          | +   | +   |
| 1074          | —   | +   |
| 1081          | +   | +   |

Table S2. Detection results of 40 samples by SERS-LFIA. (Among them, 20 cases are positive and 20 cases are negative).

| SERS-LFIA | RBPT     |          | Total |
|-----------|----------|----------|-------|
|           | positive | negative |       |
| +         | 20       | 0        | 20    |
| —         | 0        | 20       | 20    |

|       |    |    |    |
|-------|----|----|----|
| Total | 20 | 20 | 40 |
|-------|----|----|----|

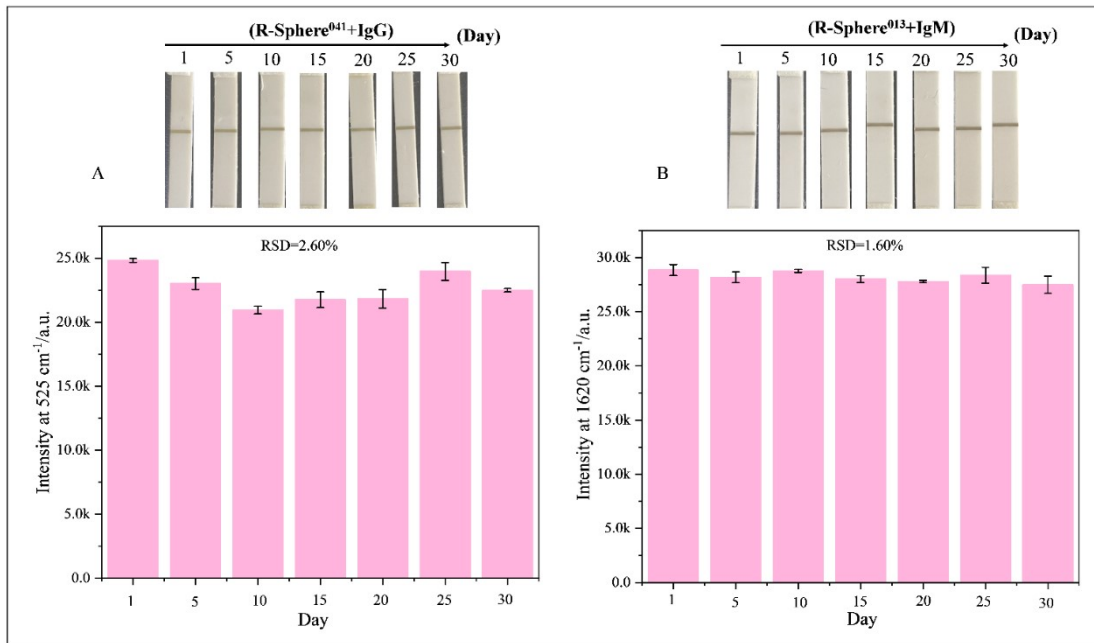

Figure S1. A: Stability study of R-Sphere<sup>041</sup>-IgG immune probe within 30 days.  
 B: Stability study of R-Sphere<sup>013</sup>-IgM immune probe within 30 days.
